# Supplementary material for: Need for permanent pacemaker implantation following implantation of the rapid deployment valve in combined procedures: a single centre cohort study
Source: PubMed Central journal article supplement — J Thorac Dis. 2021 Apr;13(4):2128–36. doi: 10.21037/jtd-20-3120 (PMC8107573; doi:10.21037/jtd-20-3120), 2021-04
Supplement: jtd-13-04-2128-dss.pdf [file jtd-13-04-2128-dss.pdf]

## Data Sharing Statement

|                     |                                                                                                                                                    |                                                                                                                                                                                                                                                                                                                                                                                                                                                                                                                                          |
|---------------------|----------------------------------------------------------------------------------------------------------------------------------------------------|------------------------------------------------------------------------------------------------------------------------------------------------------------------------------------------------------------------------------------------------------------------------------------------------------------------------------------------------------------------------------------------------------------------------------------------------------------------------------------------------------------------------------------------|
| <b>Article Info</b> | <a href="http://dx.doi.org/10.21037/jtd-20-3120">http://dx.doi.org/10.21037/jtd-20-3120</a> .                                                      |                                                                                                                                                                                                                                                                                                                                                                                                                                                                                                                                          |
| <b>Item</b>         | <b>Question</b>                                                                                                                                    | <b>Authors' Response<br/>(place "-" if not applicable)</b>                                                                                                                                                                                                                                                                                                                                                                                                                                                                               |
| 1                   | Would you like to share data collected for your study to others?                                                                                   | No                                                                                                                                                                                                                                                                                                                                                                                                                                                                                                                                       |
| 2                   | If not, would you like to share the reason for your decision?                                                                                      | The informed consent document for this study did not include a detailed Data Use Agreement (DUA). Ethics committee approval of our institution for this particular study did not include sharing any data with third parties. Since the current personal data protection laws are very strict in Germany, we cannot agree to share the patient data for ethical reasons and in order to not violate federal German regulations. But we will consider sharing data and including DUA to the informed consent document for future studies. |
| 3                   | What data in particular will be shared?                                                                                                            | None                                                                                                                                                                                                                                                                                                                                                                                                                                                                                                                                     |
| 4                   | Any other documents will be share? Such as study protocol, statistical analysis plan, informed consent form, clinical study report, analytic code. | No                                                                                                                                                                                                                                                                                                                                                                                                                                                                                                                                       |
| 5                   | When will data availability begin?                                                                                                                 | -                                                                                                                                                                                                                                                                                                                                                                                                                                                                                                                                        |
| 6                   | When will data availability end?                                                                                                                   | -                                                                                                                                                                                                                                                                                                                                                                                                                                                                                                                                        |
| 7                   | To whom will you share the data?                                                                                                                   | -                                                                                                                                                                                                                                                                                                                                                                                                                                                                                                                                        |
| 8                   | For what type of analysis or purpose?                                                                                                              | -                                                                                                                                                                                                                                                                                                                                                                                                                                                                                                                                        |
| 9                   | How or where can the data/documents be obtained?                                                                                                   | -                                                                                                                                                                                                                                                                                                                                                                                                                                                                                                                                        |

|    |                         |     |
|----|-------------------------|-----|
| 10 | Any other restrictions? | N/A |
|----|-------------------------|-----|
