# Supplementary material for: Need for permanent pacemaker implantation following implantation of the rapid deployment valve in combined procedures: a single centre cohort study
Source: PubMed Central journal article supplement — J Thorac Dis. 2021 Apr;13(4):2128–36. doi: 10.21037/jtd-20-3120 (PMC8107573; doi:10.21037/jtd-20-3120), 2021-04
Supplement: jtd-13-04-2128-supplementary.pdf [file jtd-13-04-2128-supplementary.pdf]

Table S1 Listing of all variables analyzed

| Variable                           | P value |                    |              |
|------------------------------------|---------|--------------------|--------------|
|                                    | t-test  | Chi square Pearson | Fisher exact |
| Age >60 years                      | –       | 0.350              | 0.435        |
| Euro score II $\geq 7\%$           | 0.863   | –                  | –            |
| Bypass time                        | 0.290   | –                  | –            |
| X clamp time                       | 0.149   | –                  | –            |
| Gender                             | –       | 0.051              | 0.059        |
| Ejection fraction $\leq 30\%$      | –       | 0.751              | 0.559        |
| NYHA III or IV                     | –       | 0.233              | 0.437        |
| BMI (kg/m <sup>2</sup> ) $\geq 30$ | –       | 0.376              | 0.679        |
| Valve size 19                      | –       | 0.445              | 0.731        |
| Valve size 21                      | –       | 0.375              | 0.879        |
| Valve size 23                      | –       | 0.268              | 0.328        |
| Valve size 25                      | –       | 0.102              | 0.160        |
| Valve size 27                      | –       | 0.011              | 0.041        |
| Sinus rhythm                       | –       | 0.402              | 0.395        |
| Sinus bradycardia                  | –       | 0.283              | 0.591        |
| AV block I or II                   | –       | 0.153              | 0.155        |
| Complete/incomplete RBBB           | –       | 0.031              | 0.045        |
| Complete/incomplete LBBB           | –       | 0.746              | 0.906        |
| Pulmonary hypertension             | –       | 0.343              | 0.682        |
| Arterial hypertension              | –       | 0.958              | 0.662        |
| Myocardial infarction              | –       | 0.489              | 0.444        |

NYHA, New York Heart Association; BMI, body mass index; AV, atrioventricular; RBBB, right bundle branch block; LBBB, left bundle branch block.
